# Supplementary material for: Developmental and molecular physiological evidence for the role of phosphoenolpyruvate carboxylase in rapid cotton fibre elongation
Source: PubMed Central journal article supplement — J Exp Bot. 2009 Oct 8;61(1):287–95. doi: 10.1093/jxb/erp299 (PMC2791122; doi:10.1093/jxb/erp299), 2009-10-08
Supplement: erp299_1.pdf [file erp299_1.pdf]

## **Supplemental Material**

### **Developmental and molecular physiological evidence for the role of phosphoenolpyruvate carboxylase in rapid cotton fibre elongation**

Xiao-Rong Li, Lu Wang and Yong-Ling Ruan\*

↓  
Ser

GhPEPC1 : MAAAGIRLSKKTTEMAGRKRVKMSISDAQRLRLVAFPKVSVDDDLVBYDAVLLDRFLDLDLQDLHGDDLRVTVQVQCYELSAFYEGKSTPKKRLBELGNVLTSLDPEGDSI VTRNS : 110  
GhPEPC2 : -----MASFNNNNNNGKPEKLSASIDAQRLRLVBAKVSDDDLVBYDAVLLDRFLDLDLQDLHGDDLRVTVQVQCYELSAFYEGKSTPKKRLBELGNVLTSLDPEGDSI VTRNS : 103  
AtPPC1 : -----MANRR-----LEKMASIDVHRLRLVBAKVSDDDLVBYDAVLLDRFLDLDLQDLHGDDLRVTVQVQCYELSAFYEGKSTPKKRLBELGNVLTSLDPEGDSI VTRNS : 97  
AtPPC2 : -----MAARN-----LEKMASIDVHRLRLVBAKVSDDDLVBYDAVLLDRFLDLDLQDLHGDDLRVTVQVQCYELSAFYEGKSTPKKRLBELGNVLTSLDPEGDSI VTRNS : 97  
LePPC1 : -----MTRRN-----LDKMASIDVHRLRLVBAKVSDDDLVBYDAVLLDRFLDLDLQDLHGDDLRVTVQVQCYELSAFYEGKSTPKKRLBELGNVLTSLDPEGDSI VTRNS : 97  
LePPC2 : -----MTRRN-----LEKMASIDVHRLRLVBAKVSDDDLVBYDAVLLDRFLDLDLQDLHGDDLRVTVQVQCYELSAFYEGKSTPKKRLBELGNVLTSLDPEGDSI VTRNS : 97  
ZmPEPC-C3 : -----MAALG----PKMERLSISDAQRLRLVBAKVSDDDLVBYDAVLLDRFLDLDLQDLHGDDLRVTVQVQCYELSAFYEGKSTPKKRLBELGNVLTSLDPEGDSI VTRNS : 99  
ZmPEPC-C4 : -----MASTKAP---GPGSRHHSISDAQRLRLVBAKVSDDDLVBYDAVLLDRFLDLDLQDLHGDDLRVTVQVQCYELSAFYEGKSTPKKRLBELGNVLTSLDPEGDSI VTRNS : 101

GhPEPC1 : FSHMLNLGLAEEVQIAARRRRLKLRK-CDADENSATTESSDDEETKRLVLDLKKSPBEVFDALKNQTVDLVLTAAHTQSVRRSLLQKHGRIRNCLTQLYAKDITDDDKQ : 219  
GhPEPC2 : FSHMLNLGLAEEVQIAARRRRLKLRK-CDADENSATTESSDDEETKRLVLDLKKSPBEVFDALKNQTVDLVLTAAHTQSVRRSLLQKHGRIRNCLTQLYAKDITDDDKQ : 212  
AtPPC1 : FSHMLNLGLAEEVQIAARRRRLKLRK-CDADENSATTESSDDEETKRLVLDLKKSPBEVFDALKNQTVDLVLTAAHTQSVRRSLLQKHGRIRNCLTQLYAKDITDDDKQ : 207  
AtPPC2 : FSHMLNLGLAEEVQIAARRRRLKLRK-CDADENSATTESSDDEETKRLVLDLKKSPBEVFDALKNQTVDLVLTAAHTQSVRRSLLQKHGRIRNCLTQLYAKDITDDDKQ : 206  
LePPC1 : FSHMLNLGLAEEVQIAARRRRLKLRK-CDADENSATTESSDDEETKRLVLDLKKSPBEVFDALKNQTVDLVLTAAHTQSVRRSLLQKHGRIRNCLTQLYAKDITDDDKQ : 207  
LePPC2 : FSHMLNLGLAEEVQIAARRRRLKLRK-CDADENSATTESSDDEETKRLVLDLKKSPBEVFDALKNQTVDLVLTAAHTQSVRRSLLQKHGRIRNCLTQLYAKDITDDDKQ : 206  
ZmPEPC-C3 : FSHMLNLGLAEEVQIAARRRRLKLRK-CDADENSATTESSDDEETKRLVLDLKKSPBEVFDALKNQTVDLVLTAAHTQSVRRSLLQKHGRIRNCLTQLYAKDITDDDKQ : 208  
ZmPEPC-C4 : ILSHMLNLGLAEEVQIAARRRRLKLRK-CDADENSATTESSDDEETKRLVLDLKKSPBEVFDALKNQTVDLVLTAAHTQSVRRSLLQKHGRIRNCLTQLYAKDITDDDKQ : 211

loopIII: regulatory function

conserved motif I for catalytic activity

1

GhPEPC1 : ELDEALQREIQAAFRTDEIRRTPTPQDEMAGMSYFHEHTVWKGVPKFLRRVDTALKNI GINERVYPYNAPLIQFSSWMGGDRDGNPRVTEVTRDVCLLARMMMAANLYYS : 329  
GhPEPC2 : ELDEALQREIQAAFRTDEIRRTPTPQDEMAGMSYFHEHTVWKGVPKFLRRVDTALKNI GINERVYPYNAPLIQFSSWMGGDRDGNPRVTEVTRDVCLLARMMMAANLYYS : 322  
AtPPC1 : ELDEALQREIQAAFRTDEIRRTPTPQDEMAGMSYFHEHTVWKGVPKFLRRVDTALKNI GINERVYPYNAPLIQFSSWMGGDRDGNPRVTEVTRDVCLLARMMMAANLYYS : 317  
AtPPC2 : ELDEALQREIQAAFRTDEIRRTPTPQDEMAGMSYFHEHTVWKGVPKFLRRVDTALKNI GINERVYPYNAPLIQFSSWMGGDRDGNPRVTEVTRDVCLLARMMMAANLYYS : 316  
LePPC1 : ELDEALQREIQAAFRTDEIRRTPTPQDEMAGMSYFHEHTVWKGVPKFLRRVDTALKNI GINERVYPYNAPLIQFSSWMGGDRDGNPRVTEVTRDVCLLARMMMAANLYYS : 317  
LePPC2 : ELDEALQREIQAAFRTDEIRRTPTPQDEMAGMSYFHEHTVWKGVPKFLRRVDTALKNI GINERVYPYNAPLIQFSSWMGGDRDGNPRVTEVTRDVCLLARMMMAANLYYS : 316  
ZmPEPC-C3 : ELDEALQREIQAAFRTDEIRRTPTPQDEMAGMSYFHEHTVWKGVPKFLRRVDTALKNI GINERVYPYNAPLIQFSSWMGGDRDGNPRVTEVTRDVCLLARMMMAANLYYS : 318  
ZmPEPC-C4 : ELDEALQREIQAAFRTDEIRRTPTPQDEMAGMSYFHEHTVWKGVPKFLRRVDTALKNI GINERVYPYNAPLIQFSSWMGGDRDGNPRVTEVTRDVCLLARMMMAANLYYS : 321

2

Arg account for subunit interaction

3

4

5

GhPEPC1 : QIDELMFEISMWRQSDRLRRADELHRLR-SKK-DAKHYIFBWKQVPEPEYRVIILGDVRDKLYITREARRSLLANGSDDIPEEAATITVBOFLEPLELCYRSLQACGDREI : 438  
GhPEPC2 : QIDELMFEISMWRQSDRLRRADELHRLR-SRR-DAKHYIFBWKQVPEPEYRVIILGDVRDKLYITREARRSLLANGSDDIPEEAATITVBOFLEPLELCYRSLQACGDREI : 431  
AtPPC1 : QIDELMFEISMWRQSDRLRRADELHRLR-SRR-DAKHYIFBWKQVPEPEYRVIILGDVRDKLYITREARRSLLANGSDDIPEEAATITVBOFLEPLELCYRSLQACGDREI : 427  
AtPPC2 : QIDELMFEISMWRQSDRLRRADELHRLR-SRR-DAKHYIFBWKQVPEPEYRVIILGDVRDKLYITREARRSLLANGSDDIPEEAATITVBOFLEPLELCYRSLQACGDREI : 424  
LePPC1 : QIDELMFEISMWRQSDRLRRADELHRLR-SRR-DAKHYIFBWKQVPEPEYRVIILGDVRDKLYITREARRSLLANGSDDIPEEAATITVBOFLEPLELCYRSLQACGDREI : 425  
LePPC2 : QIDELMFEISMWRQSDRLRRADELHRLR-SRR-DAKHYIFBWKQVPEPEYRVIILGDVRDKLYITREARRSLLANGSDDIPEEAATITVBOFLEPLELCYRSLQACGDREI : 425  
ZmPEPC-C3 : QIDELMFEISMWRQSDRLRRADELHRLR-SRR-DAKHYIFBWKQVPEPEYRVIILGDVRDKLYITREARRSLLANGSDDIPEEAATITVBOFLEPLELCYRSLQACGDREI : 427  
ZmPEPC-C4 : QIDELMFEISMWRQSDRLRRADELHRLR-SRR-DAKHYIFBWKQVPEPEYRVIILGDVRDKLYITREARRSLLANGSDDIPEEAATITVBOFLEPLELCYRSLQACGDREI : 431

GhPEPC1 : ADGSLLEDLRQVSTFGLSLVRLDIQBSDRHTDVLDAITTHLIGSGYREWTEERQEWLLSEISGRPLFCEDLPKTEBEADVLDLTFHVLAEPLSDPFGAYIISMATAPS : 548  
GhPEPC2 : ADGSLLEDLRQVSTFGLSLVRLDIQBSDRHTDVLDAITTHLIGSGYREWTEERQEWLLSEISGRPLFCEDLPKTEBEADVLDLTFHVLAEPLSDPFGAYIISMATAPS : 541  
AtPPC1 : ADGSLLEDLRQVSTFGLSLVRLDIQBSDRHTDVLDAITTHLIGSGYREWTEERQEWLLSEISGRPLFCEDLPKTEBEADVLDLTFHVLAEPLSDPFGAYIISMATAPS : 537  
AtPPC2 : ADGSLLEDLRQVSTFGLSLVRLDIQBSDRHTDVLDAITTHLIGSGYREWTEERQEWLLSEISGRPLFCEDLPKTEBEADVLDLTFHVLAEPLSDPFGAYIISMATAPS : 534  
LePPC1 : ADGSLLEDLRQVSTFGLSLVRLDIQBSDRHTDVLDAITTHLIGSGYREWTEERQEWLLSEISGRPLFCEDLPKTEBEADVLDLTFHVLAEPLSDPFGAYIISMATAPS : 535  
LePPC2 : ADGSLLEDLRQVSTFGLSLVRLDIQBSDRHTDVLDAITTHLIGSGYREWTEERQEWLLSEISGRPLFCEDLPKTEBEADVLDLTFHVLAEPLSDPFGAYIISMATAPS : 535  
ZmPEPC-C3 : ADGSLLEDLRQVSTFGLSLVRLDIQBSDRHTDVLDAITTHLIGSGYREWTEERQEWLLSEISGRPLFCEDLPKTEBEADVLDLTFHVLAEPLSDPFGAYIISMATAPS : 537  
ZmPEPC-C4 : ADGSLLEDLRQVSTFGLSLVRLDIQBSDRHTDVLDAITTHLIGSGYREWTEERQEWLLSEISGRPLFCEDLPKTEBEADVLDLTFHVLAEPLSDPFGAYIISMATAPS : 541

GhPEPC1 : DVLAVELLQRECHVKQPLRVVPLEFKLADLDAAPAAVARLFSIDMYRNRINGKQVVMGYSDSGKDAGRLSAAWQLYKAOBELIKVAKQVGVKLLMFHGRGGTVGRGGGF : 658  
GhPEPC2 : DVLAVELLQRECHVKQPLRVVPLEFKLADLDAAPAAVARLFSIDMYRNRINGKQVVMGYSDSGKDAGRLSAAWQLYKAOBELIKVAKQVGVKLLMFHGRGGTVGRGGGF : 651  
AtPPC1 : DVLAVELLQRECHVKQPLRVVPLEFKLADLDAAPAAVARLFSIDMYRNRINGKQVVMGYSDSGKDAGRLSAAWQLYKAOBELIKVAKQVGVKLLMFHGRGGTVGRGGGF : 647  
AtPPC2 : DVLAVELLQRECHVKQPLRVVPLEFKLADLDAAPAAVARLFSIDMYRNRINGKQVVMGYSDSGKDAGRLSAAWQLYKAOBELIKVAKQVGVKLLMFHGRGGTVGRGGGF : 644  
LePPC1 : DVLAVELLQRECHVKQPLRVVPLEFKLADLDAAPAAVARLFSIDMYRNRINGKQVVMGYSDSGKDAGRLSAAWQLYKAOBELIKVAKQVGVKLLMFHGRGGTVGRGGGF : 645  
LePPC2 : DVLAVELLQRECHVKQPLRVVPLEFKLADLDAAPAAVARLFSIDMYRNRINGKQVVMGYSDSGKDAGRLSAAWQLYKAOBELIKVAKQVGVKLLMFHGRGGTVGRGGGF : 645  
ZmPEPC-C3 : DVLAVELLQRECHVKQPLRVVPLEFKLADLDAAPAAVARLFSIDMYRNRINGKQVVMGYSDSGKDAGRLSAAWQLYKAOBELIKVAKQVGVKLLMFHGRGGTVGRGGGF : 647  
ZmPEPC-C4 : DVLAVELLQRECHVKQPLRVVPLEFKLADLDAAPAAVARLFSIDMYRNRINGKQVVMGYSDSGKDAGRLSAAWQLYKAOBELIKVAKQVGVKLLMFHGRGGTVGRGGGF : 651

loop I : PEP binding site

GhPEPC1 : THLAILSQPPDITIGSIRVTVQGEVIEQSGFEEHLCFRTLQRFATLLEHGMHPVPSKPEWRALDDEMAVVATKQYRSVVEQERFVEYFRNATPELEYGRMNI GSRPS : 768  
GhPEPC2 : THLAILSQPPDITIGSIRVTVQGEVIEQSGFEEHLCFRTLQRFATLLEHGMHPVPSKPEWRALDDEMAVVATKQYRSVVEQERFVEYFRNATPELEYGRMNI GSRPS : 761  
AtPPC1 : THLAILSQPPDITIGSIRVTVQGEVIEQSGFEEHLCFRTLQRFATLLEHGMHPVPSKPEWRALDDEMAVVATKQYRSVVEQERFVEYFRNATPELEYGRMNI GSRPS : 757  
AtPPC2 : THLAILSQPPDITIGSIRVTVQGEVIEQSGFEEHLCFRTLQRFATLLEHGMHPVPSKPEWRALDDEMAVVATKQYRSVVEQERFVEYFRNATPELEYGRMNI GSRPS : 754  
LePPC1 : THLAILSQPPDITIGSIRVTVQGEVIEQSGFEEHLCFRTLQRFATLLEHGMHPVPSKPEWRALDDEMAVVATKQYRSVVEQERFVEYFRNATPELEYGRMNI GSRPS : 755  
LePPC2 : THLAILSQPPDITIGSIRVTVQGEVIEQSGFEEHLCFRTLQRFATLLEHGMHPVPSKPEWRALDDEMAVVATKQYRSVVEQERFVEYFRNATPELEYGRMNI GSRPS : 755  
ZmPEPC-C3 : THLAILSQPPDITIGSIRVTVQGEVIEQSGFEEHLCFRTLQRFATLLEHGMHPVPSKPEWRALDDEMAVVATKQYRSVVEQERFVEYFRNATPELEYGRMNI GSRPS : 757  
ZmPEPC-C4 : THLAILSQPPDITIGSIRVTVQGEVIEQSGFEEHLCFRTLQRFATLLEHGMHPVPSKPEWRALDDEMAVVATKQYRSVVEQERFVEYFRNATPELEYGRMNI GSRPS : 761

\*

GhPEPC1 : KRKPSGGIESLRAIPIPIAWTQRFHLPVWLGCGAARHVIVKQDIRNLHLOEMHNMWPFPRVTDLLEVMVFAKQDPIGIAALDKLLVSEDLWSEGLRRLRANPEETKRLS : 878  
GhPEPC2 : KRKPSGGIESLRAIPIPIAWTQRFHLPVWLGCGAARHVIVKQDIRNLHLOEMHNMWPFPRVTDLLEVMVFAKQDPIGIAALDKLLVSEDLWSEGLRRLRANPEETKRLS : 871  
AtPPC1 : KRKPSGGIESLRAIPIPIAWTQRFHLPVWLGCGAARHVIVKQDIRNLHLOEMHNMWPFPRVTDLLEVMVFAKQDPIGIAALDKLLVSEDLWSEGLRRLRANPEETKRLS : 867  
AtPPC2 : KRKPSGGIESLRAIPIPIAWTQRFHLPVWLGCGAARHVIVKQDIRNLHLOEMHNMWPFPRVTDLLEVMVFAKQDPIGIAALDKLLVSEDLWSEGLRRLRANPEETKRLS : 864  
LePPC1 : KRKPSGGIESLRAIPIPIAWTQRFHLPVWLGCGAARHVIVKQDIRNLHLOEMHNMWPFPRVTDLLEVMVFAKQDPIGIAALDKLLVSEDLWSEGLRRLRANPEETKRLS : 865  
LePPC2 : KRKPSGGIESLRAIPIPIAWTQRFHLPVWLGCGAARHVIVKQDIRNLHLOEMHNMWPFPRVTDLLEVMVFAKQDPIGIAALDKLLVSEDLWSEGLRRLRANPEETKRLS : 865  
ZmPEPC-C3 : KRKPSGGIESLRAIPIPIAWTQRFHLPVWLGCGAARHVIVKQDIRNLHLOEMHNMWPFPRVTDLLEVMVFAKQDPIGIAALDKLLVSEDLWSEGLRRLRANPEETKRLS : 867  
ZmPEPC-C4 : KRKPSGGIESLRAIPIPIAWTQRFHLPVWLGCGAARHVIVKQDIRNLHLOEMHNMWPFPRVTDLLEVMVFAKQDPIGIAALDKLLVSEDLWSEGLRRLRANPEETKRLS : 871

loop II: HCO<sub>3</sub> binding site

GhPEPC1 : FQVAGHRDLEEDPFLKQRLRLDAITTLNVQAYTLKRIREDPQVHVKVRPHLSREYMESSKAAAEVLVKNLFTSEYAPGLDITLTMKGIAAGHNTG : 978  
GhPEPC2 : FQVAGHRDLEEDPFLKQRLRLDAITTLNVQAYTLKRIREDPQVHVKVRPHLSREYMESSKAAAEVLVKNLFTSEYAPGLDITLTMKGIAAGHNTG : 971  
AtPPC1 : FQVAGHRDLEEDPFLKQRLRLDAITTLNVQAYTLKRIREDPQVHVKVRPHLSREYMESSKAAAEVLVKNLFTSEYAPGLDITLTMKGIAAGHNTG : 967  
AtPPC2 : LQVAGHRDLEEDPFLKQRLRLDAITTLNVQAYTLKRIREDPQVHVKVRPHLSREYMESSKAAAEVLVKNLFTSEYAPGLDITLTMKGIAAGHNTG : 963  
LePPC1 : LQVAGHRDLEEDPFLKQRLRLDAITTLNVQAYTLKRIREDPQVHVKVRPHLSREYMESSKAAAEVLVKNLFTSEYAPGLDITLTMKGIAAGHNTG : 964  
LePPC2 : LQVAGHRDLEEDPFLKQRLRLDAITTLNVQAYTLKRIREDPQVHVKVRPHLSREYMESSKAAAEVLVKNLFTSEYAPGLDITLTMKGIAAGHNTG : 964  
ZmPEPC-C3 : FQVAGHRDLEEDPFLKQRLRLDAITTLNVQAYTLKRIREDPQVHVKVRPHLSREYMESSKAAAEVLVKNLFTSEYAPGLDITLTMKGIAAGHNTG : 967  
ZmPEPC-C4 : LQVAGHRDLEEDPFLKQRLRLDAITTLNVQAYTLKRIREDPQVHVKVRPHLSREYMESSKAAAEVLVKNLFTSEYAPGLDITLTMKGIAAGHNTG : 970

loopIV: regulatory function

conserved motif II for catalytic activity

**Supplemental Fig. 1.** Alignment of the deduced amino acid sequences of GhPEPC1 and GhPEPC2 with PEPCs from other plant species. Putative regulatory and catalytic domains are underlined. The arrow marks the phosphorylable Ser residue at the phosphorylation domain (underlined); \*, the position of the C3 signature Ala; C (1-5), plant conserved Cys residues. The accession numbers of these known proteins in Genbank are as follows: GhPEPC1 (AF008939); GhPEPC2 (EU032328); AtPPC1 (AJ532901); AtPPC2 (AJ532902); LePPC1 (AJ243416); LePPC2 (AJ243417); ZmPEPC-C3 (X61489); ZmPEPC-C4 (NM\_001111948).

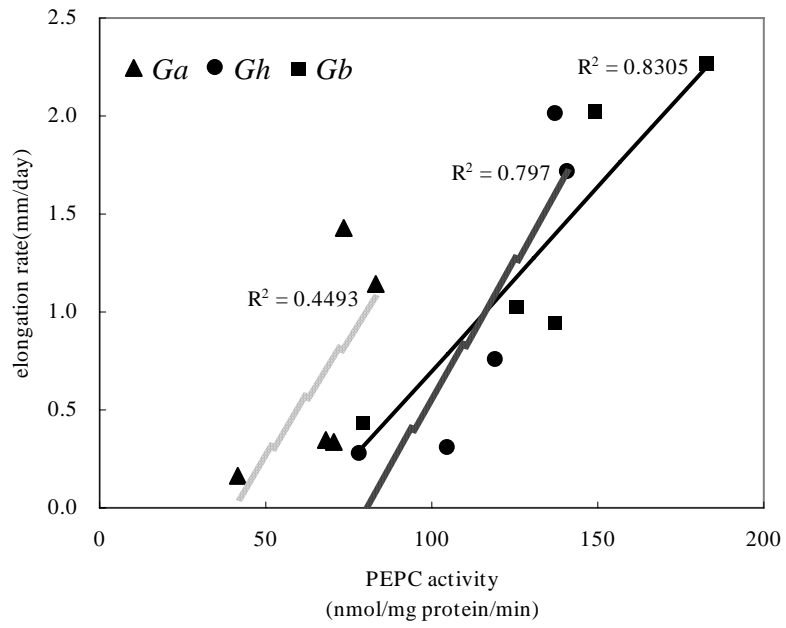

**Supplemental Fig. 2.** Correlation analyses between PEPC activity and fiber elongation rate among *Ga*, *Gh* and *Gb*, ( Data re-plotted from Figs 2A and B).
